# Supplementary material
Source: PubMed Central journal article supplement (PMC3416451)
Supplement: supp_80.7.2538_IAI-IAI06354-11-s01.pdf [file supp_80.7.2538_IAI-IAI06354-11-s01.pdf]

**Figure S1**

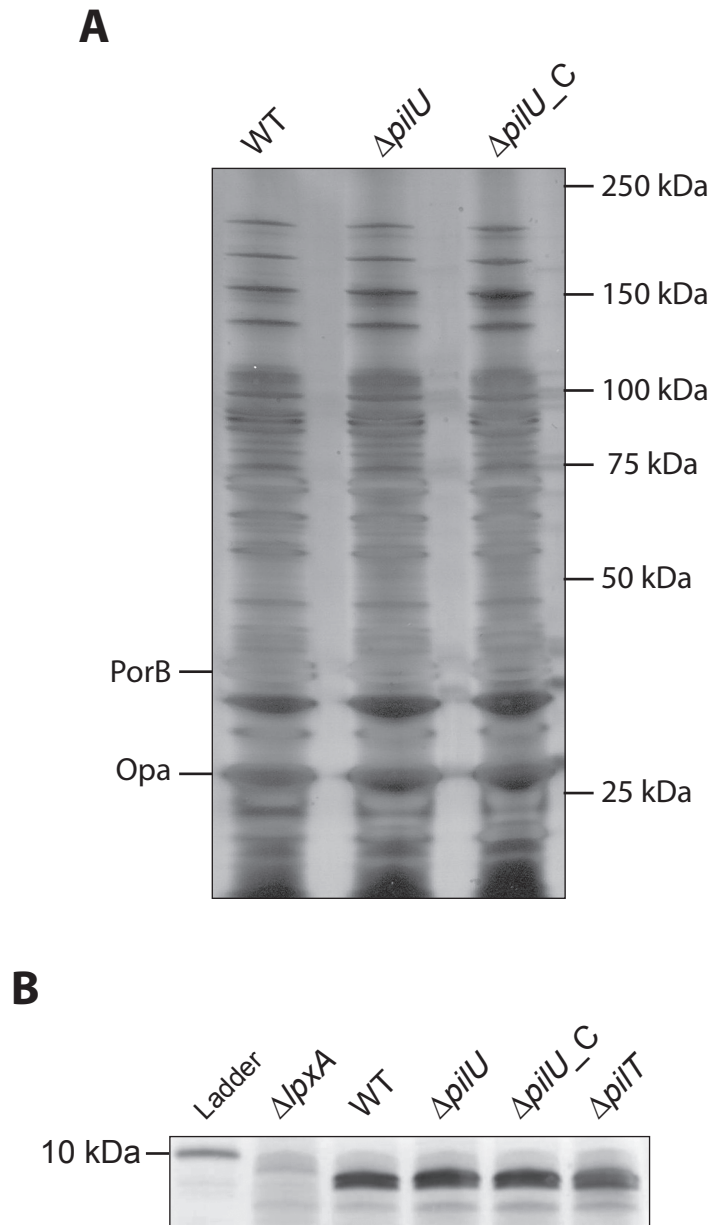

Figure S1. Outer membrane profile and LOS expression in FAM20 PilU mutant is similar to wild-type. (A) Silver stained SDS-PAGE gel of outer membrane preparations. The band corresponding to PorB is poorly stained due to over loading. (B) LOS extractions from bacteria were run on tricine SDS-PAGE and visualized with silver staining. The FAM20  $\Delta$ *lpxA* strain, lacking LOS, was used as negative control.
